# Supplementary material for: Tuning the electronic properties of defect-rich MoS2
Source: publisher site journal article supplement (doi:10.3762/bjnano.17.56), 2026-06-16
Supplement: Additional file 1 [file 2190-4286-17-56-S1.pdf]

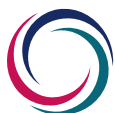

## Supporting Information

for

### **Tuning the electronic properties of defect-rich MoS<sub>2</sub>**

Eric Juriatti, Martina Binninger, Carolin Schüle, Maren Zirwick, Katarina Margetic, Erika Giangrisostomi, Marcus Scheele and Heiko Peisert

*Beilstein J. Nanotechnol.* **2026**, *17*, 796–805. [doi:10.3762/bjnano.17.56](https://doi.org/10.3762/bjnano.17.56)

## Additional figures and tables

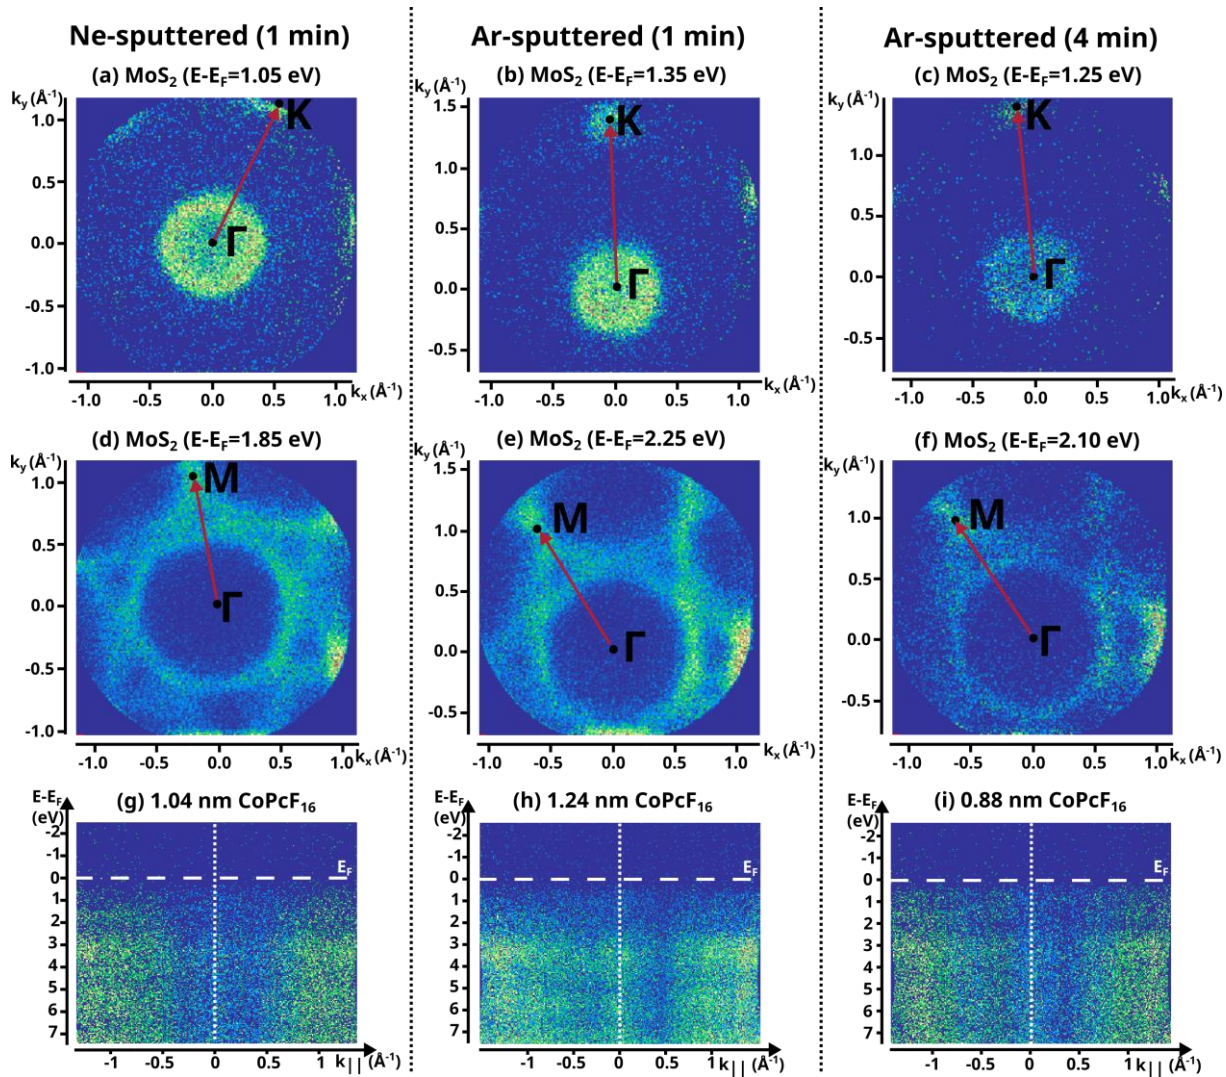

**Figure S1:**  $k_x$ - $k_y$ -maps at selected energies showing K (a-c) and M (d-f) for the three pristine MoS<sub>2</sub> samples and ARPES band structures of the multilayer CoPcF<sub>16</sub> coverages (g-i) on given substrates.

The fitting of the C 1s and N 1s spectra shown in Figure 4 was performed using established models for perfluorinated phthalocyanines [1]. The C 1s spectra consist of three individual carbon components, representing C-C (C1), C-N (C2) and C-F (C3) bonds, accompanied by satellite peaks (S1, S2, S3) at higher binding energies. The intensity ratio  $C1+S1/C2+2/C3+S3$  is in good agreement with the stoichiometry of CoPcF<sub>16</sub> (see Table S1). The N 1s spectra were fitted with a single main nitrogen peak (N) and an additional satellite (S) at higher binding energies (see Table S2). For all spectra, the fitting model was essentially independent of the

film thickness and the underlying substrate. The different energetic shifts of the individual carbon components and the N 1s level, indicated by broken lines in Figure 4, may hint to a different electron distribution in the molecule at the interface compared to the bulk, but can also be explained by site-dependent screening effects [2,3].

**Table S1:** Fit parameters for the C 1s spectra shown in Figure 4.

| <b>a) Ne<sup>+</sup> (1 min)</b><br><b>+ 0.39 nm</b><br><b>CoPcF<sub>16</sub></b> | Position [eV] | Gaussian width<br>[eV] | Lorentzian<br>width [eV] | rel. area [%] |
|-----------------------------------------------------------------------------------|---------------|------------------------|--------------------------|---------------|
| C1                                                                                | 284.40        | 0.55                   | 0.15                     | 26.6          |
| S1                                                                                | 285.75        | 0.55                   | 0.15                     | 0.5           |
| C2                                                                                | 285.53        | 0.54                   | 0.30                     | 21.7          |
| S2                                                                                | 287.42        | 0.54                   | 0.30                     | 5.4           |
| C3                                                                                | 286.67        | 0.56                   | 0.14                     | 36.1          |
| S3                                                                                | 288.23        | 0.56                   | 0.14                     | 9.6           |
| <b>Ne<sup>+</sup> (1 min) +</b><br><b>1.04 nm</b><br><b>CoPcF<sub>16</sub></b>    |               |                        |                          |               |
| C1                                                                                | 284.80        | 0.80                   | 0.30                     | 22.8          |
| S1                                                                                | 286.01        | 0.80                   | 0.30                     | 1.1           |
| C2                                                                                | 285.97        | 0.81                   | 0.30                     | 17.1          |
| S2                                                                                | 287.78        | 0.81                   | 0.30                     | 6.5           |
| C3                                                                                | 286.89        | 0.76                   | 0.30                     | 44.0          |
| S3                                                                                | 288.63        | 0.76                   | 0.30                     | 8.5           |

| <b>b) Ar<sup>+</sup> (1 min)</b> | Position [eV] | Gaussian width | Lorentzian | rel. area [%] |
|----------------------------------|---------------|----------------|------------|---------------|
| <b>+ 0.19 nm</b>                 |               | [eV]           | width [eV] |               |
| <b>CoPcF<sub>16</sub></b>        |               |                |            |               |
| C1                               | 284.42        | 0.55           | 0.15       | 24.1          |
| S1                               | 285.63        | 0.55           | 0.15       | 0.5           |
| C2                               | 285.52        | 0.52           | 0.30       | 21.3          |
| S2                               | 288.06        | 0.52           | 0.30       | 7.5           |
| C3                               | 286.68        | 0.55           | 0.10       | 40.3          |
| S3                               | 288.76        | 0.55           | 0.10       | 6.3           |

| <b>Ar<sup>+</sup> (1 min) +</b> |        |      |      |      |
|---------------------------------|--------|------|------|------|
| <b>1.24 nm</b>                  |        |      |      |      |
| <b>CoPcF<sub>16</sub></b>       |        |      |      |      |
| C1                              | 284.81 | 0.70 | 0.30 | 24.0 |
| S1                              | 286.01 | 0.70 | 0.30 | 0.5  |
| C2                              | 286.04 | 0.83 | 0.30 | 17.2 |
| S2                              | 288.27 | 0.83 | 0.30 | 6.5  |
| C3                              | 286.98 | 0.69 | 0.30 | 46.8 |
| S3                              | 289.09 | 0.69 | 0.30 | 5.0  |

| <b>c) Ar<sup>+</sup> (4 min)</b> | Position [eV] | Gaussian width | Lorentzian | rel. area [%] |
|----------------------------------|---------------|----------------|------------|---------------|
| <b>+ 0.36 nm</b>                 |               | [eV]           | width [eV] |               |
| <b>CoPcF<sub>16</sub></b>        |               |                |            |               |
| C1                               | 284.40        | 0.65           | 0.15       | 26.0          |
| S1                               | 285.75        | 0.65           | 0.15       | 0.8           |
| C2                               | 285.53        | 0.75           | 0.30       | 22.3          |

|                                 |        |      |      |      |
|---------------------------------|--------|------|------|------|
| S2                              | 287.42 | 0.75 | 0.30 | 5.6  |
| C3                              | 286.67 | 0.65 | 0.18 | 35.9 |
| S3                              | 288.17 | 0.65 | 0.18 | 9.5  |
| <hr/>                           |        |      |      |      |
| <b>Ar<sup>+</sup> (4 min) +</b> |        |      |      |      |
| <b>0.88 nm</b>                  |        |      |      |      |
| <b>CoPcF<sub>16</sub></b>       |        |      |      |      |
| <hr/>                           |        |      |      |      |
| C1                              | 284.56 | 0.80 | 0.30 | 22.9 |
| S1                              | 286.16 | 0.80 | 0.30 | 0.7  |
| C2                              | 285.70 | 0.83 | 0.30 | 18.1 |
| S2                              | 287.70 | 0.83 | 0.30 | 8.1  |
| C3                              | 286.76 | 0.80 | 0.30 | 40.2 |
| S3                              | 288.56 | 0.80 | 0.30 | 10.1 |

**Table S2:** Fit parameters for the N 1s spectra shown in Figure 4.

| <b>d) Ne<sup>+</sup> (1 min)+</b> | Position [eV] | Gaussian width<br>[eV] | Lorentzian<br>width [eV] | rel. area [%] |
|-----------------------------------|---------------|------------------------|--------------------------|---------------|
| <b>0.39 nm</b>                    |               |                        |                          |               |
| <b>CoPcF<sub>16</sub></b>         |               |                        |                          |               |
| <hr/>                             |               |                        |                          |               |
| N                                 | 398.29        | 1.04                   | 0.30                     | 85.4          |
| S                                 | 400.29        | 1.04                   | 0.30                     | 14.6          |
| <hr/>                             |               |                        |                          |               |
| <b>Ne<sup>+</sup> (1 min) +</b>   |               |                        |                          |               |
| <b>1.04 nm</b>                    |               |                        |                          |               |
| <b>CoPcF<sub>16</sub></b>         |               |                        |                          |               |
| <hr/>                             |               |                        |                          |               |
| N                                 | 398.75        | 1.16                   | 0.30                     | 90.6          |
| S                                 | 400.85        | 1.16                   | 0.30                     | 9.4           |
| <hr/>                             |               |                        |                          |               |

| <b>e) Ar<sup>+</sup> (1 min)</b>   | Position [eV] | Gaussian width<br>[eV] | Lorentzian<br>width [eV] | rel. area [%] |
|------------------------------------|---------------|------------------------|--------------------------|---------------|
| <b>+ 0.19 nm</b>                   |               |                        |                          |               |
| <b>CoPcF<sub>16</sub></b>          |               |                        |                          |               |
| N                                  | 398.31        | 1.04                   | 0.30                     | 85.4          |
| S                                  | 400.51        | 1.04                   | 0.30                     | 14.6          |
| <b>Ar<sup>+</sup> (1 min) +</b>    |               |                        |                          |               |
| <b>1.24 nm</b>                     |               |                        |                          |               |
| <b>CoPcF<sub>16</sub></b>          |               |                        |                          |               |
| N                                  | 398.77        | 1.09                   | 0.24                     | 96.2          |
| S                                  | 400.72        | 1.09                   | 0.24                     | 3.8           |
| <b>f) Ar<sup>+</sup> (4 min) +</b> | Position [eV] | Gaussian width<br>[eV] | Lorentzian<br>width [eV] | rel. area [%] |
| <b>0.36 nm</b>                     |               |                        |                          |               |
| <b>CoPcF<sub>16</sub></b>          |               |                        |                          |               |
| N                                  | 398.34        | 1.02                   | 0.26                     | 86.2          |
| S                                  | 400.35        | 1.02                   | 0.26                     | 13.8          |
| <b>Ar<sup>+</sup> (4 min) +</b>    |               |                        |                          |               |
| <b>0.88 nm</b>                     |               |                        |                          |               |
| <b>CoPcF<sub>16</sub></b>          |               |                        |                          |               |
| N                                  | 398.72        | 1.26                   | 1.26                     | 91.2          |
| S                                  | 400.74        | 0.10                   | 0.10                     | 8.8           |

**Table S3:** Fit parameters for the Mo 3d spectra measured with low surface sensitivity ( $h\nu = 900$  eV) shown in Figure 5.

| <b>a) MoS<sub>2</sub></b>     | Position [eV] | Gaussian width<br>[eV] | Lorentzian<br>width [eV] | rel. area [%] |
|-------------------------------|---------------|------------------------|--------------------------|---------------|
| Mo(IV) 3d <sub>5/2</sub>      | 228.51        | 1.76                   | 0.28                     | 51.9          |
| Mo(IV) 3d <sub>3/2</sub>      | 231.72        | 1.76                   | 0.43                     | 35.0          |
| S 2s                          | 225.64        | 2.00                   | 0.67                     | 13.1          |
| <b>Ne<sup>+</sup> (1 min)</b> |               |                        |                          |               |
| Mo(IV) 3d <sub>5/2</sub>      | 228.62        | 1.76                   | 0.29                     | 51.3          |
| Mo(IV) 3d <sub>3/2</sub>      | 231.80        | 1.76                   | 0.44                     | 34.5          |
| Mo(0) 3d <sub>5/2</sub>       | 227.56        | 1.76                   | 0.28                     | 0.7           |
| Mo(0) 3d <sub>3/2</sub>       | 230.74        | 1.76                   | 0.28                     | 0.5           |
| S 2s                          | 225.79        | 2.00                   | 0.68                     | 13.0          |
| <b>0.39 nm</b>                |               |                        |                          |               |
| <b>CoPcF<sub>16</sub></b>     |               |                        |                          |               |
| Mo(IV) 3d <sub>5/2</sub>      | 228.63        | 1.76                   | 0.29                     | 51.7          |
| Mo(IV) 3d <sub>3/2</sub>      | 231.84        | 1.76                   | 0.44                     | 34.9          |
| Mo(0) 3d <sub>5/2</sub>       | 227.05        | 1.75                   | 0.28                     | 0.7           |
| Mo(0) 3d <sub>3/2</sub>       | 230.20        | 1.75                   | 0.28                     | 0.5           |
| S 2s                          | 225.76        | 2.00                   | 0.62                     | 12.1          |
| <b>1.04 nm</b>                |               |                        |                          |               |
| <b>CoPcF<sub>16</sub></b>     |               |                        |                          |               |
| Mo(IV) 3d <sub>5/2</sub>      | 228.69        | 2.20                   | 0.29                     | 52.9          |
| Mo(IV) 3d <sub>3/2</sub>      | 231.94        | 2.20                   | 0.41                     | 34.8          |
| Mo(0) 3d <sub>5/2</sub>       | 227.40        | 2.10                   | 0.29                     | 0.8           |

|                         |        |      |      |      |
|-------------------------|--------|------|------|------|
| Mo(0) 3d <sub>3/2</sub> | 230.50 | 2.10 | 0.29 | 0.6  |
| S 2s                    | 225.63 | 2.00 | 0.68 | 10.9 |

---

| <b>b) MoS<sub>2</sub></b> | Position [eV] | Gaussian width<br>[eV] | Lorentzian<br>width [eV] | rel. area [%] |
|---------------------------|---------------|------------------------|--------------------------|---------------|
|---------------------------|---------------|------------------------|--------------------------|---------------|

---

|                          |        |      |      |      |
|--------------------------|--------|------|------|------|
| Mo(IV) 3d <sub>5/2</sub> | 229.02 | 1.76 | 0.20 | 50.7 |
| Mo(IV) 3d <sub>3/2</sub> | 232.21 | 1.76 | 0.30 | 34.6 |
| S 2s                     | 226.19 | 2.03 | 0.90 | 14.7 |

---

**Ar<sup>+</sup> (1 min)**

|                          |        |      |      |      |
|--------------------------|--------|------|------|------|
| Mo(IV) 3d <sub>5/2</sub> | 228.69 | 1.76 | 0.20 | 51.1 |
| Mo(IV) 3d <sub>3/2</sub> | 231.90 | 1.76 | 0.30 | 34.7 |
| S 2s                     | 225.84 | 2.03 | 0.90 | 14.1 |

---

**0.19 nm**

**CoPcF<sub>16</sub>**

|                          |        |      |      |      |
|--------------------------|--------|------|------|------|
| Mo(IV) 3d <sub>5/2</sub> | 228.71 | 1.76 | 0.20 | 50.5 |
| Mo(IV) 3d <sub>3/2</sub> | 231.88 | 1.76 | 0.30 | 34.4 |
| S 2s                     | 225.99 | 2.03 | 0.90 | 15.1 |

---

**1.24 nm**

**CoPcF<sub>16</sub>**

|                          |        |      |      |      |
|--------------------------|--------|------|------|------|
| Mo(IV) 3d <sub>5/2</sub> | 228.64 | 1.76 | 0.20 | 50.7 |
| Mo(IV) 3d <sub>3/2</sub> | 231.79 | 1.76 | 0.30 | 34.2 |
| S 2s                     | 226.00 | 2.03 | 0.90 | 15.1 |

---

| <b>c) MoS<sub>2</sub></b> | Position [eV] | Gaussian width<br>[eV] | Lorentzian<br>width [eV] | rel. area [%] |
|---------------------------|---------------|------------------------|--------------------------|---------------|
|---------------------------|---------------|------------------------|--------------------------|---------------|

---

|                          |        |      |      |      |
|--------------------------|--------|------|------|------|
| Mo(IV) 3d <sub>5/2</sub> | 228.56 | 1.95 | 0.25 | 51.4 |
| Mo(IV) 3d <sub>3/2</sub> | 231.79 | 1.95 | 0.35 | 34.8 |
| S 2s                     | 225.65 | 1.50 | 1.29 | 13.8 |

---

**Ar<sup>+</sup> (4 min)**

|                          |        |      |      |      |
|--------------------------|--------|------|------|------|
| Mo(IV) 3d <sub>5/2</sub> | 228.35 | 1.99 | 0.15 | 48.6 |
| Mo(IV) 3d <sub>3/2</sub> | 231.56 | 1.99 | 0.30 | 32.6 |
| Mo(0) 3d <sub>5/2</sub>  | 227.53 | 2.00 | 0.15 | 2.8  |
| Mo(0) 3d <sub>3/2</sub>  | 230.73 | 2.00 | 0.15 | 1.9  |
| S 2s                     | 225.49 | 2.00 | 0.88 | 14.1 |

---

**0.36 nm**

**CoPcF<sub>16</sub>**

|                          |        |      |      |      |
|--------------------------|--------|------|------|------|
| Mo(IV) 3d <sub>5/2</sub> | 228.49 | 1.91 | 0.15 | 48.9 |
| Mo(IV) 3d <sub>3/2</sub> | 231.74 | 1.91 | 0.30 | 33.0 |
| Mo(0) 3d <sub>5/2</sub>  | 227.30 | 2.00 | 0.15 | 3.3  |
| Mo(0) 3d <sub>3/2</sub>  | 230.50 | 2.00 | 0.15 | 2.2  |
| S 2s                     | 225.55 | 1.73 | 1.00 | 12.5 |

---

**0.88 nm**

**CoPcF<sub>16</sub>**

|                          |        |      |      |      |
|--------------------------|--------|------|------|------|
| Mo(IV) 3d <sub>5/2</sub> | 228.72 | 1.90 | 0.15 | 48.3 |
| Mo(IV) 3d <sub>3/2</sub> | 231.90 | 1.90 | 0.30 | 32.5 |
| Mo(0) 3d <sub>5/2</sub>  | 227.28 | 2.00 | 0.15 | 3.6  |
| Mo(0) 3d <sub>3/2</sub>  | 230.38 | 2.00 | 0.15 | 2.4  |
| S 2s                     | 225.89 | 1.75 | 1.00 | 13.3 |

**Table S4:** Fit parameters for the Mo 3d spectra measured with high surface sensitivity ( $h\nu = 300$  eV) shown in Figure 5.

| <b>d) MoS<sub>2</sub></b>         | Position [eV] | Gaussian width<br>[eV] | Lorentzian<br>width [eV] | rel. area [%] |
|-----------------------------------|---------------|------------------------|--------------------------|---------------|
| Mo(IV) 3d <sub>5/2</sub>          | 228.81        | 0.15                   | 0.18                     | 51.0          |
| Mo(IV) 3d <sub>3/2</sub>          | 231.97        | 0.15                   | 0.41                     | 31.8          |
| S 2s                              | 226.02        | 1.32                   | 0.20                     | 17.2          |
| <b>Ne<sup>+</sup> (1 min)</b>     |               |                        |                          |               |
| Mo(IV) 3d <sub>5/2</sub>          | 228.86        | 0.32                   | 0.20                     | 45.7          |
| Mo(IV) 3d <sub>3/2</sub>          | 232.03        | 0.32                   | 0.40                     | 29.1          |
| Mo(0) 3d <sub>5/2</sub>           | 228.50        | 0.32                   | 0.20                     | 5.9           |
| Mo(0) 3d <sub>3/2</sub>           | 231.55        | 0.32                   | 0.20                     | 3.8           |
| S 2s                              | 226.03        | 1.53                   | 0.12                     | 15.6          |
| <b>0.39 nm CoPcF<sub>16</sub></b> |               |                        |                          |               |
| Mo(IV) 3d <sub>5/2</sub>          | 228.93        | 0.32                   | 0.20                     | 47.6          |
| Mo(IV) 3d <sub>3/2</sub>          | 232.10        | 0.32                   | 0.44                     | 31.4          |
| Mo(0) 3d <sub>5/2</sub>           | 228.54        | 0.30                   | 0.20                     | 5.8           |
| Mo(0) 3d <sub>3/2</sub>           | 231.74        | 0.30                   | 0.20                     | 3.7           |
| S 2s                              | 226.20        | 1.30                   | 0.44                     | 11.6          |
| <b>1.04 nm CoPcF<sub>16</sub></b> |               |                        |                          |               |
| Mo(IV) 3d <sub>5/2</sub>          | 228.87        | 0.31                   | 0.20                     | 45.8          |
| Mo(IV) 3d <sub>3/2</sub>          | 232.04        | 0.31                   | 0.44                     | 30.7          |
| Mo(0) 3d <sub>5/2</sub>           | 228.50        | 0.30                   | 0.20                     | 5.9           |
| Mo(0) 3d <sub>3/2</sub>           | 231.62        | 0.30                   | 0.20                     | 3.8           |
| S 2s                              | 225.97        | 1.30                   | 0.54                     | 13.7          |

| <b>e) MoS<sub>2</sub></b>         | Position [eV] | Gaussian width<br>[eV] | Lorentzian<br>width [eV] | rel. area [%] |
|-----------------------------------|---------------|------------------------|--------------------------|---------------|
| Mo(IV) 3d <sub>5/2</sub>          | 229.17        | 0.16                   | 0.17                     | 49.3          |
| Mo(IV) 3d <sub>3/2</sub>          | 232.32        | 0.16                   | 0.48                     | 32.9          |
| S 2s                              | 226.19        | 0.80                   | 1.0                      | 17.8          |
| <b>Ar<sup>+</sup> (1 min)</b>     |               |                        |                          |               |
| Mo(IV) 3d <sub>5/2</sub>          | 229.00        | 0.27                   | 0.17                     | 44.2          |
| Mo(IV) 3d <sub>3/2</sub>          | 232.18        | 0.27                   | 0.51                     | 28.9          |
| Mo(0) 3d <sub>5/2</sub>           | 228.63        | 0.27                   | 0.18                     | 6.8           |
| Mo(0) 3d <sub>3/2</sub>           | 231.97        | 0.27                   | 0.18                     | 4.4           |
| S 2s                              | 226.14        | 0.80                   | 1.00                     | 15.7          |
| <b>0.19 nm CoPcF<sub>16</sub></b> |               |                        |                          |               |
| Mo(IV) 3d <sub>5/2</sub>          | 228.97        | 0.27                   | 0.17                     | 45.0          |
| Mo(IV) 3d <sub>3/2</sub>          | 232.15        | 0.27                   | 0.47                     | 29.0          |
| Mo(0) 3d <sub>5/2</sub>           | 228.63        | 0.27                   | 0.18                     | 6.9           |
| Mo(0) 3d <sub>3/2</sub>           | 231.88        | 0.27                   | 0.18                     | 4.4           |
| S 2s                              | 226.11        | 0.80                   | 1.00                     | 14.7          |
| <b>1.24 nm CoPcF<sub>16</sub></b> |               |                        |                          |               |
| Mo(IV) 3d <sub>5/2</sub>          | 229.03        | 0.27                   | 0.17                     | 44.2          |
| Mo(IV) 3d <sub>3/2</sub>          | 232.20        | 0.27                   | 0.43                     | 29.5          |
| Mo(0) 3d <sub>5/2</sub>           | 228.70        | 0.27                   | 0.18                     | 6.5           |
| Mo(0) 3d <sub>3/2</sub>           | 231.95        | 0.27                   | 0.18                     | 4.1           |
| S 2s                              | 226.12        | 0.80                   | 1.00                     | 15.76         |

| <b>f) MoS<sub>2</sub></b>         | Position [eV] | Gaussian width<br>[eV] | Lorentzian<br>width [eV] | rel. area [%] |
|-----------------------------------|---------------|------------------------|--------------------------|---------------|
| Mo(IV) 3d <sub>5/2</sub>          | 228.95        | 0.22                   | 0.14                     | 50.9          |
| Mo(IV) 3d <sub>3/2</sub>          | 232.11        | 0.22                   | 0.38                     | 32.7          |
| S 2s                              | 225.96        | 0.69                   | 0.75                     | 16.3          |
| <b>Ar<sup>+</sup> (4 min)</b>     |               |                        |                          |               |
| Mo(IV) 3d <sub>5/2</sub>          | 228.85        | 0.41                   | 0.14                     | 43.8          |
| Mo(IV) 3d <sub>3/2</sub>          | 232.02        | 0.41                   | 0.38                     | 28.4          |
| Mo(0) 3d <sub>5/2</sub>           | 228.42        | 0.40                   | 0.14                     | 9.8           |
| Mo(0) 3d <sub>3/2</sub>           | 231.61        | 0.40                   | 0.14                     | 6.5           |
| S 2s                              | 226.01        | 0.69                   | 0.75                     | 11.6          |
| <b>0.36 nm CoPcF<sub>16</sub></b> |               |                        |                          |               |
| Mo(IV) 3d <sub>5/2</sub>          | 228.83        | 0.41                   | 0.14                     | 43.4          |
| Mo(IV) 3d <sub>3/2</sub>          | 232.03        | 0.41                   | 0.38                     | 28.0          |
| Mo(0) 3d <sub>5/2</sub>           | 228.45        | 0.40                   | 0.14                     | 9.8           |
| Mo(0) 3d <sub>3/2</sub>           | 231.68        | 0.40                   | 0.14                     | 6.5           |
| S 2s                              | 225.84        | 0.69                   | 0.75                     | 12.4          |
| <b>0.88 nm CoPcF<sub>16</sub></b> |               |                        |                          |               |
| Mo(IV) 3d <sub>5/2</sub>          | 228.90        | 0.42                   | 0.14                     | 41.9          |
| Mo(IV) 3d <sub>3/2</sub>          | 232.12        | 0.42                   | 0.39                     | 27.3          |
| Mo(0) 3d <sub>5/2</sub>           | 228.55        | 0.41                   | 0.14                     | 10.0          |
| Mo(0) 3d <sub>3/2</sub>           | 231.77        | 0.41                   | 0.14                     | 6.5           |
| S 2s                              | 226.06        | 0.69                   | 0.75                     | 14.3          |

### Low surface sensitivity ( $\lambda \sim 2.6$ nm)

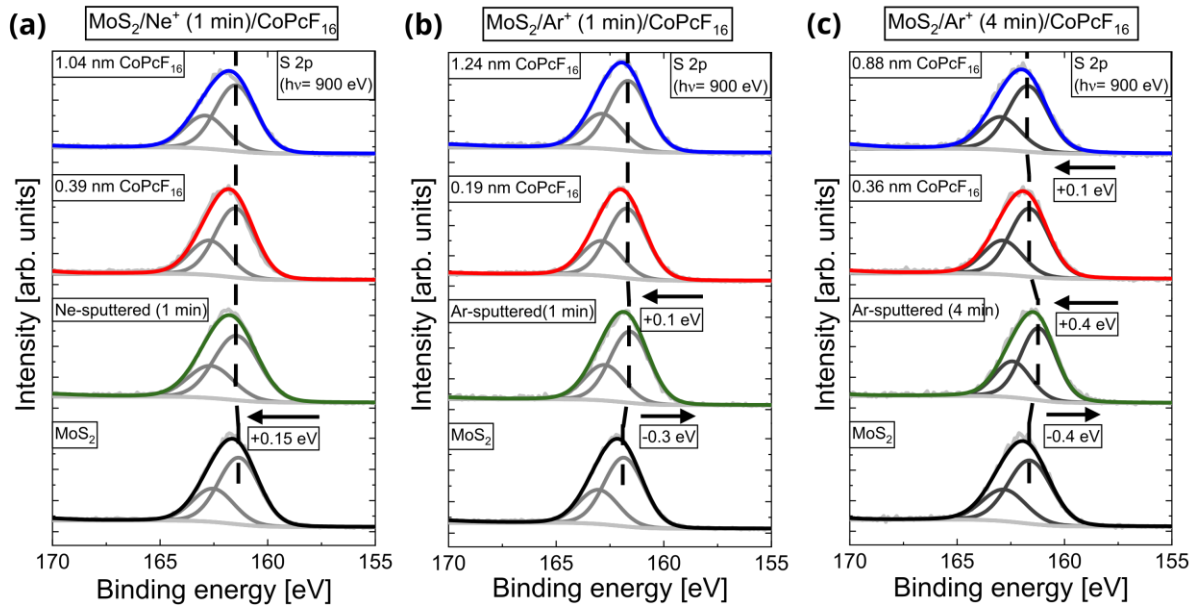

### High surface sensitivity ( $\lambda \sim 0.9$ nm)

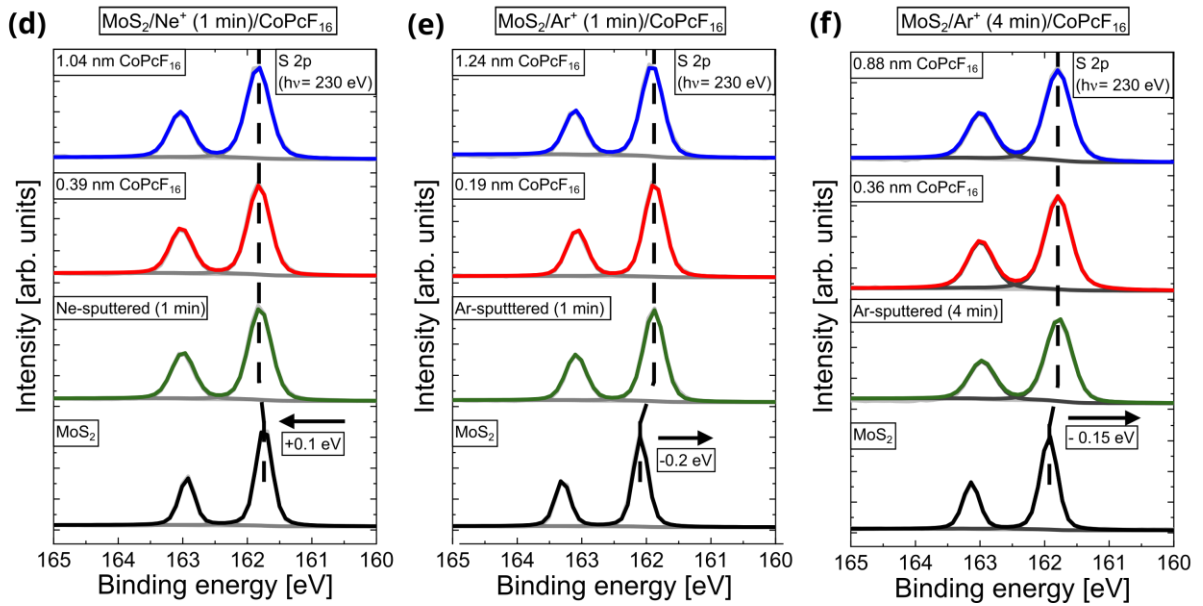

**Figure S2:** X-ray photoelectron spectroscopy (XPS) measurements of the S 2p core levels of  $\text{MoS}_2$  following the sputtering with Ar and Ne and the deposition of  $\text{CoPcF}_{16}$ .

**Table S5:** Fit parameters for the S 2p spectra measured with low surface sensitivity ( $h\nu= 900$  eV) shown in Figure S2.

| <b>a) MoS<sub>2</sub></b>     | Position [eV] | Gaussian width<br>[eV] | Lorentzian<br>width [eV] | rel. area [%] |
|-------------------------------|---------------|------------------------|--------------------------|---------------|
| S 2p <sub>3/2</sub>           | 161.33        | 2.14                   | 0.20                     | 66.7          |
| S 2p <sub>1/2</sub>           | 162.53        | 2.14                   | 0.20                     | 33.3          |
| <b>Ne<sup>+</sup> (1 min)</b> |               |                        |                          |               |
| S 2p <sub>3/2</sub>           | 161.44        | 2.37                   | 0.20                     | 66.7          |
| S 2p <sub>1/2</sub>           | 162.64        | 2.37                   | 0.20                     | 33.3          |
| <b>0.39 nm</b>                |               |                        |                          |               |
| <b>CoPcF<sub>16</sub></b>     |               |                        |                          |               |
| S 2p <sub>3/2</sub>           | 161.50        | 2.10                   | 0.20                     | 66.7          |
| S 2p <sub>1/2</sub>           | 162.70        | 2.10                   | 0.20                     | 33.3          |
| <b>1.04 nm</b>                |               |                        |                          |               |
| <b>CoPcF<sub>16</sub></b>     |               |                        |                          |               |
| S 2p <sub>3/2</sub>           | 161.48        | 2.15                   | 0.20                     | 66.7          |
| S 2p <sub>1/2</sub>           | 162.68        | 2.15                   | 0.20                     | 33.3          |
| <b>b) MoS<sub>2</sub></b>     | Position [eV] | Gaussian width<br>[eV] | Lorentzian<br>width [eV] | rel. area [%] |
| S 2p <sub>3/2</sub>           | 161.84        | 2.08                   | 0.17                     | 66.7          |
| S 2p <sub>1/2</sub>           | 163.02        | 2.08                   | 0.17                     | 33.3          |
| <b>Ar<sup>+</sup> (1 min)</b> |               |                        |                          |               |
| S 2p <sub>3/2</sub>           | 161.57        | 2.08                   | 0.17                     | 66.7          |
| S 2p <sub>1/2</sub>           | 162.75        | 2.08                   | 0.17                     | 33.3          |

| <b>0.19 nm</b>                |               |                        |                          |               |
|-------------------------------|---------------|------------------------|--------------------------|---------------|
| <b>CoPcF<sub>16</sub></b>     |               |                        |                          |               |
| S 2p <sub>3/2</sub>           | 161.71        | 2.08                   | 0.17                     | 66.7          |
| S 2p <sub>1/2</sub>           | 162.89        | 2.08                   | 0.17                     | 33.3          |
| <b>1.24 nm</b>                |               |                        |                          |               |
| <b>CoPcF<sub>16</sub></b>     |               |                        |                          |               |
| S 2p <sub>3/2</sub>           | 161.65        | 2.08                   | 0.17                     | 66.6          |
| S 2p <sub>1/2</sub>           | 162.87        | 2.08                   | 0.17                     | 33.4          |
| <b>c) MoS<sub>2</sub></b>     | Position [eV] | Gaussian width<br>[eV] | Lorentzian<br>width [eV] | rel. area [%] |
| S 2p <sub>3/2</sub>           | 161.61        | 2.26                   | 0.24                     | 66.7          |
| S 2p <sub>1/2</sub>           | 162.81        | 2.26                   | 0.24                     | 33.3          |
| <b>Ar<sup>+</sup> (4 min)</b> |               |                        |                          |               |
| S 2p <sub>3/2</sub>           | 161.20        | 1.80                   | 0.30                     | 66.7          |
| S 2p <sub>1/2</sub>           | 162.41        | 1.80                   | 0.30                     | 33.3          |
| <b>0.36 nm</b>                |               |                        |                          |               |
| <b>CoPcF<sub>16</sub></b>     |               |                        |                          |               |
| S 2p <sub>3/2</sub>           | 161.63        | 2.00                   | 0.32                     | 66.6          |
| S 2p <sub>1/2</sub>           | 162.87        | 2.00                   | 0.32                     | 33.4          |
| <b>0.88 nm</b>                |               |                        |                          |               |
| <b>CoPcF<sub>16</sub></b>     |               |                        |                          |               |
| S 2p <sub>3/2</sub>           | 161.70        | 2.00                   | 0.41                     | 66.7          |
| S 2p <sub>1/2</sub>           | 162.98        | 2.00                   | 0.41                     | 33.3          |

**Table S6:** Fit parameters for the S 2p spectra measured with high surface ( $h\nu=230$  eV) sensitivity shown in Figure S2.

| <b>d) MoS<sub>2</sub></b>     | Position [eV] | Gaussian width<br>[eV] | Lorentzian<br>width [eV] | rel. area [%] |
|-------------------------------|---------------|------------------------|--------------------------|---------------|
| S 2p <sub>3/2</sub>           | 161.74        | 0.23                   | 0.10                     | 68.6          |
| S 2p <sub>1/2</sub>           | 162.94        | 0.23                   | 0.10                     | 31.4          |
| <b>Ne<sup>+</sup> (1 min)</b> |               |                        |                          |               |
| S 2p <sub>3/2</sub>           | 161.80        | 0.36                   | 0.10                     | 66.4          |
| S 2p <sub>1/2</sub>           | 163.00        | 0.36                   | 0.10                     | 33.6          |
| <b>0.39 nm</b>                |               |                        |                          |               |
| <b>CoPcF<sub>16</sub></b>     |               |                        |                          |               |
| S 2p <sub>3/2</sub>           | 161.81        | 0.36                   | 0.10                     | 65.8          |
| S 2p <sub>1/2</sub>           | 163.03        | 0.36                   | 0.10                     | 34.2          |
| <b>1.04 nm</b>                |               |                        |                          |               |
| <b>CoPcF<sub>16</sub></b>     |               |                        |                          |               |
| S 2p <sub>3/2</sub>           | 161.84        | 0.36                   | 0.13                     | 67.2          |
| S 2p <sub>1/2</sub>           | 163.04        | 0.36                   | 0.13                     | 32.8          |
| <b>e) MoS<sub>2</sub></b>     | Position [eV] | Gaussian width<br>[eV] | Lorentzian<br>width [eV] | rel. area [%] |
| S 2p <sub>3/2</sub>           | 162.08        | 0.22                   | 0.10                     | 65.2          |
| S 2p <sub>1/2</sub>           | 163.29        | 0.22                   | 0.10                     | 34.8          |
| <b>Ar<sup>+</sup> (1 min)</b> |               |                        |                          |               |
| S 2p <sub>3/2</sub>           | 161.89        | 0.33                   | 0.10                     | 66.5          |
| S 2p <sub>1/2</sub>           | 163.08        | 0.33                   | 0.10                     | 33.5          |

| <b>0.19 nm</b>                |               |                        |                          |               |
|-------------------------------|---------------|------------------------|--------------------------|---------------|
| <b>CoPcF<sub>16</sub></b>     |               |                        |                          |               |
| S 2p <sub>3/2</sub>           | 161.87        | 0.31                   | 0.10                     | 66.9          |
| S 2p <sub>1/2</sub>           | 163.08        | 0.31                   | 0.10                     | 33.1          |
| <b>1.24 nm</b>                |               |                        |                          |               |
| <b>CoPcF<sub>16</sub></b>     |               |                        |                          |               |
| S 2p <sub>3/2</sub>           | 161.91        | 0.34                   | 0.10                     | 68.1          |
| S 2p <sub>1/2</sub>           | 163.11        | 0.34                   | 0.10                     | 31.9          |
| <b>f) MoS<sub>2</sub></b>     | Position [eV] | Gaussian width<br>[eV] | Lorentzian<br>width [eV] | rel. area [%] |
| S 2p <sub>3/2</sub>           | 161.94        | 0.26                   | 0.10                     | 67.6          |
| S 2p <sub>1/2</sub>           | 163.13        | 0.26                   | 0.10                     | 32.4          |
| <b>Ar<sup>+</sup> (4 min)</b> |               |                        |                          |               |
| S 2p <sub>3/2</sub>           | 161.78        | 0.41                   | 0.12                     | 68.8          |
| S 2p <sub>1/2</sub>           | 162.96        | 0.41                   | 0.12                     | 31.2          |
| <b>0.36 nm</b>                |               |                        |                          |               |
| <b>CoPcF<sub>16</sub></b>     |               |                        |                          |               |
| S 2p <sub>3/2</sub>           | 161.79        | 0.36                   | 0.19                     | 66.3          |
| S 2p <sub>1/2</sub>           | 162.99        | 0.36                   | 0.19                     | 33.7          |
| <b>0.88 nm</b>                |               |                        |                          |               |
| <b>CoPcF<sub>16</sub></b>     |               |                        |                          |               |
| S 2p <sub>3/2</sub>           | 161.79        | 0.40                   | 0.15                     | 66.2          |
| S 2p <sub>1/2</sub>           | 162.99        | 0.40                   | 0.15                     | 33.8          |

To give further insights in the nature of defects produced by sputtering, the change in Mo/S-ratio can be considered. The ratio is calculated with the core level intensities given in Table S1 and the photoionization cross-sections  $\sigma$  provided by Yeh and Lindau [4] via Equation S1.

$$\text{Mo:S} = \frac{I_{\text{Mo } 3d} / \sigma_{\text{Mo } 3d}}{I_{\text{S } 2s} / \sigma_{\text{S } 2s}} \quad (\text{S1})$$

**Table S7:** Mo/S-ratio before and after sputtering for the experiments depicted in Figure 5.

| Experiment                          | Mo:S (before sputtering) | Mo:S (after sputtering) | Relative change (%) |
|-------------------------------------|--------------------------|-------------------------|---------------------|
| Ne <sup>+</sup> (1 min, hv= 900 eV) | 1:1.56                   | 1:1.55                  | -0.1                |
| Ar <sup>+</sup> (1 min, hv= 900 eV) | 1:1.79                   | 1:1.70                  | -5.3                |
| Ar <sup>+</sup> (4 min, hv= 900 eV) | 1:1.66                   | 1:1.70                  | +2.4                |
| Ne <sup>+</sup> (1 min, hv= 300 eV) | 1:2.89                   | 1:2.57                  | -12.5               |
| Ar <sup>+</sup> (1min, hv= 300 eV)  | 1:3.01                   | 1:2.59                  | -16.2               |
| Ar <sup>+</sup> (4min, hv= 300 eV)  | 1:2.71                   | 1:1.83                  | -48.1               |

## References

- [1] Belser, A.; Greulich, K.; Grüninger, P.; Karstens, R.; Ovsyannikov, R.; Giangrisostomi, E.; Nagel, P.; Merz, M.; Schuppler, S.; Chassé, T.; Peisert, H. Perfluorinated Phthalocyanines on Cu(110) and Cu(110)-(2 × 1)O: The Special Role of the Central Cobalt Atom. *J. Phys. Chem. C* **2021**, *125* (16), 8803–8814. <https://doi.org/10.1021/acs.jpcc.1c01215>.
- [2] Haizmann, P.; Juriatti, E.; Klein, M.; Greulich, K.; Ovsyannikov, R.; Giangrisostomi, E.; Chassé, T.; Peisert, H.; Scheele, M. Tuning the Interfacial Electronic Structure of MoS<sub>2</sub> by Adsorption of Cobalt Phthalocyanine Derivatives. *ACS Appl. Electron. Mater.* **2024**, *6* (4), 2467–2477. <https://doi.org/10.1021/acsaelm.4c00094>.
- [3] Peisert, H.; Kolacyak, D.; Chassé, T. Site-Specific Charge-Transfer Screening at Organic/Metal Interfaces. *J. Phys. Chem. C* **2009**, *113* (44), 19244–19250. <https://doi.org/10.1021/jp9057548>.
- [4] Yeh, J. J.; Lindau, I. Atomic Subshell Photoionization Cross Sections and Asymmetry Parameters:  $1 \leq Z \leq 103$ . *Atomic Data and Nuclear Data Tables* **1985**, *32* (1), 1–155. [https://doi.org/10.1016/0092-640X\(85\)90016-6](https://doi.org/10.1016/0092-640X(85)90016-6).
